# Supplementary material for: Hesperidin improves insulin resistance via down-regulation of inflammatory responses: Biochemical analysis and in silico validation
Source: PLOS journal article supplement (doi:10.1371/journal.pone.0227637), 2020-01-13
Supplement: S5 (10.1371/journal.pone.0227637.s005) [file journal.pone.0227637.s005]

**S2 Table.** Surflex score of docked ligands **orlistat** (ORL) and **hesperidin** (HES) for Leptin binding domain (LBD) of leptin receptor and leptin protein complex.

| Docking complex     | CScore <sup>a</sup> | Crash score <sup>b</sup> | Polar score <sup>c</sup> | G score <sup>d</sup> | PMF score <sup>e</sup> | D score <sup>f</sup> | Chem score <sup>g</sup> | Amino acid interaction                      |
|---------------------|---------------------|--------------------------|--------------------------|----------------------|------------------------|----------------------|-------------------------|---------------------------------------------|
| ORL-LBD-LPT complex | 8.01                | -1.11                    | 3.10                     | -229.548             | 6.622                  | -171.798             | -5.238                  | Leu 568, Asn 567, Asn 566,                  |
| HES-LBD-LPT complex | 10.73               | -2.65                    | 3.28                     | -275.233             | 40.536                 | -174.108             | -21.996                 | Glu 565, Asn 566, Ser 507, Asn 567, Arg 615 |

<sup>a</sup>**CScore** is a consensus scoring which uses multiple types of scoring functions to rank the affinity of ligands, <sup>b</sup>**Crash-score** revealing the inappropriate penetration into the binding site, <sup>c</sup>**Polar** region of the ligand, <sup>d</sup>**G-score** showing hydrogen bonding, complex (ligand-protein), and internal (ligand-ligand) energies, <sup>e</sup>**PMF-score** indicating the Helmholtz free energies of interactions for protein-ligand atom pairs (Potential of Mean Force, PMF), <sup>f</sup>**D-score** for chRe and van der Waals interactions between the protein and the ligand, <sup>g</sup>**Chem-score** points for hydrogen bonding, lipophilic contact, and rotational entropy, along with an intercept term.
